# Supplementary material for: Europium–tannic acid nanocomplexes devised for bone regeneration under oxidative or inflammatory environments
Source: Royal Society of Chemistry journal article supplement (doi:10.1039/d4tb00697f), 2024-01-01
Supplement: d4tb00697f1.pdf [file d4tb00697f1.pdf]

## Electronic Supplementary Information (ESI)

# Europium–Tannic acid Nanocomplexes Devised for Bone Regeneration under Oxidative or Inflammatory Environments

Daniel Fernández-Villa <sup>a,b</sup>, María Rosa Aguilar <sup>a,b</sup>, and Luis Rojo <sup>a,b,\*</sup>

<sup>a</sup> Instituto de Ciencia y Tecnología de Polímeros (ICTP) CSIC, 28006 Madrid, Spain; danielfv@ictp.csic.es (D.F.-V.); mraguilar@ictp.csic.es (M. R. A.)

<sup>b</sup> Centro de Investigación Biomédica en Red de Bioingeniería, Biomateriales y Nanomedicina (CIBER-BBN), 28029, Madrid, Spain.

\* Correspondence: rojodelolmo@ictp.csic.es (L. R.). Tel.: +34-915-622-900

## Supplementary Tables

**Supplementary Table S1. Identification of the most relevant ATR-FTIR frequency assignments ( $\text{cm}^{-1}$ ) of TA and EuTA NCs.**

| FREQUENCY ASSIGNMENT                                            | WAVENUMBER ( $\text{cm}^{-1}$ ) |          |          |          |           |
|-----------------------------------------------------------------|---------------------------------|----------|----------|----------|-----------|
|                                                                 | TA                              | EuTA 25% | EuTA 50% | EuTA 75% | EuTA 100% |
| O–H stretching                                                  | 3000-3500                       |          |          |          |           |
| C=O stretching Carbonyl                                         | 1700                            | 1705     | 1705     | 1704     | 1704      |
| C=C stretching Aromatic                                         | 1606                            | 1606     | 1606     | 1605     | 1605      |
| C=C stretching H-symmetric Aromatic                             | 1528                            | 1505     | 1505     | 1504     | 1504      |
| C–H bending Aromatic Asymmetric, and C–C stretching             | 1446                            | 1445     | 1445     | 1444     | 1444      |
| C–O stretching ring gallic                                      | 1319                            | 1345     | 1345     | 1341     | 1344      |
| Phenyl acetate, C–O bending, and C–H bending Aromatic Symmetric | 1183                            | 1199     | 1199     | 1195     | 1198      |
| H–C=C–C bending and C–H deformation; Eu–O stretching            | 1086                            | 1085     | 1083     | 1080     | Overlap   |
| C=C stretching deformation                                      | 1010                            | 1037     | 1037     | 1032     | 1037      |
| C–H bending Aromatic Out-plane                                  | 869                             | 874      | 877      | 874      | 875       |
| C–H bending Aromatic Out-plane Asymmetric                       | 830                             | 830      | 831      | 830      | 830       |
| C–H bending Aromatic Out-plane Symmetric                        | 746                             | 755      | 756      | 755      | 756       |
| Eu–O bending                                                    | -                               | 583      | 586      | 615      | 616       |
| Eu–O bending                                                    | -                               | 539      | 536      | 537      | 539       |

**Supplementary Table S2. Regression model and parameters calculated for Figure 5A.**

| [Agonist] vs. response -- Variable slope<br>(four parameters) | TA     | EuTA 25% | EuTA 50% | EuTA 75% | EuTA 100% |
|---------------------------------------------------------------|--------|----------|----------|----------|-----------|
| Bottom                                                        | 17.62  | 12.48    | 12.34    | 13.25    | 13.23     |
| Hillslope                                                     | 3.066  | 5.844    | 3.219    | 3.439    | 3.629     |
| Top                                                           | 93.05  | 81.76    | 84.67    | 86.43    | 91.77     |
| EC50                                                          | 4.396  | 4.589    | 4.305    | 3.685    | 5.17      |
| logEC50                                                       | 0.6431 | 0.6617   | 0.634    | 0.5664   | 0.7135    |
| Span                                                          | 75.42  | 69.28    | 72.33    | 73.18    | 78.54     |
| Degrees of Freedom                                            | 16     | 16       | 16       | 16       | 16        |
| R squared                                                     | 0.9979 | 0.9969   | 0.9943   | 0.9933   | 0.997     |

**Supplementary Table S3. Regression model and parameters calculated for Figure 5B.**

| [Agonist] vs. response<br>(three parameters) | TA      | EuTA 25% | EuTA 50% | EuTA 75% | EuTA 100% |
|----------------------------------------------|---------|----------|----------|----------|-----------|
| Bottom                                       | 0.1165  | -0.4773  | 0.453    | -0.1045  | -0.03062  |
| Top                                          | 67.3    | 56.34    | 62.69    | 72.92    | 54.37     |
| EC50                                         | 0.7577  | 0.8763   | 1.014    | 1.264    | 1.134     |
| logEC50                                      | -0.1205 | -0.05734 | 0.005842 | 0.1018   | 0.05456   |
| Span                                         | 67.18   | 56.82    | 62.23    | 73.02    | 54.4      |
| Degrees of Freedom                           | 42      | 42       | 42       | 42       | 42        |
| R squared                                    | 0.9874  | 0.9625   | 0.964    | 0.9846   | 0.9812    |

**Supplementary Table S4. Regression model and parameters calculated for Figure 5D.**

| [Agonist] vs. normalized response --<br>Variable slope | TA     | EuTA 25% | EuTA 50% | EuTA 75% | EuTA 100% |
|--------------------------------------------------------|--------|----------|----------|----------|-----------|
| Hillslope                                              | 10.74  | 12.89    | 13.41    | 22.09    | 20.31     |
| EC50                                                   | 65.32  | 47.86    | 46.52    | 46.23    | 46.18     |
| logEC50                                                | 1.815  | 1.68     | 1.668    | 1.665    | 1.664     |
| Degrees of Freedom                                     | 14     | 17       | 14       | 15       | 15        |
| R squared                                              | 0.9854 | 0.9926   | 0.9909   | 0.9953   | 0.9771    |

**Supplementary Table S5. Regression model and parameters calculated for Figure 5E.**

| [Agonist] vs. response -- Variable slope<br>(four parameters) | TA     | EuTA 25% | EuTA 50% | EuTA 75% | EuTA 100% |
|---------------------------------------------------------------|--------|----------|----------|----------|-----------|
| Bottom                                                        | -1.419 | 0.09469  | -0.9997  | 0.1277   | 0.06043   |
| Hillslope                                                     | 1.125  | 2.053    | 2.357    | 3.654    | 3.154     |
| Top                                                           | 87.82  | 83.35    | 76.57    | 77.21    | 77.72     |
| EC50                                                          | 864.8  | 239.8    | 182.2    | 174.8    | 150.2     |
| logEC50                                                       | 2.937  | 2.38     | 2.261    | 2.243    | 2.177     |
| Span                                                          | 89.24  | 83.26    | 77.57    | 77.09    | 77.66     |
| Degrees of Freedom                                            | 17     | 17       | 17       | 17       | 17        |
| R squared                                                     | 0.9842 | 0.974    | 0.9893   | 0.9953   | 0.9908    |

## Supplementary Figures

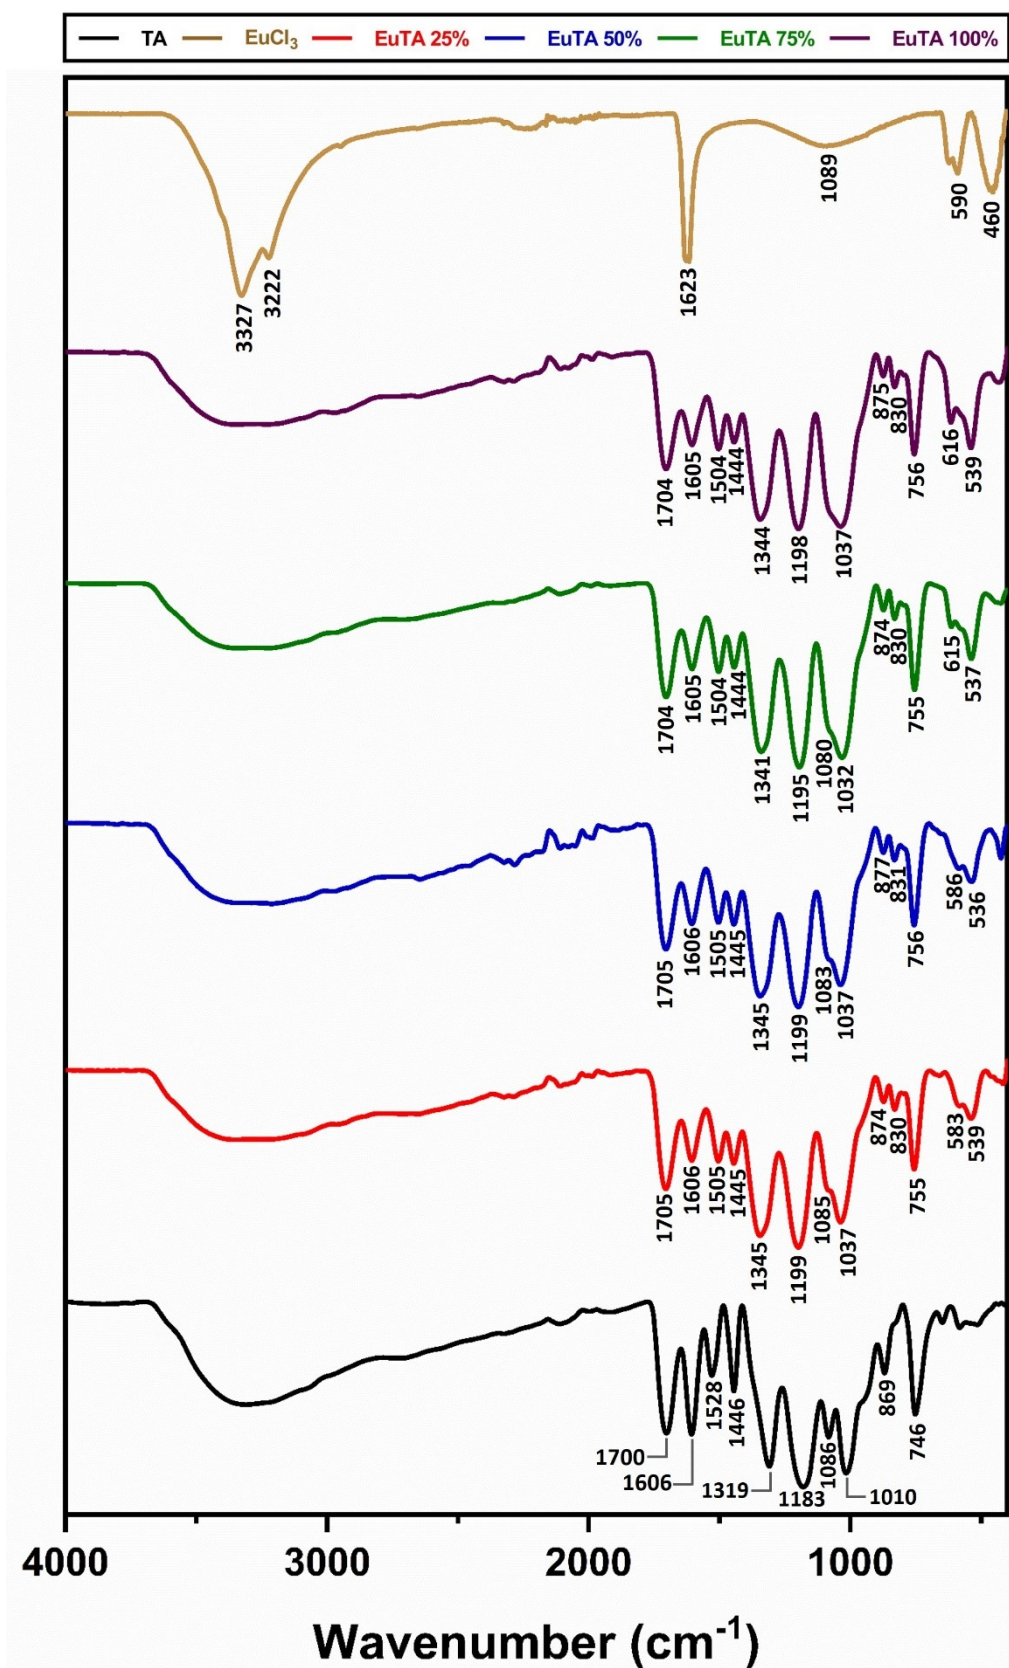

Supplementary Figure S1. ATR-FTIR spectroscopic characterization of TA,  $\text{EuCl}_3$ , and EuTA NCs (4000 to 400  $\text{cm}^{-1}$ ).

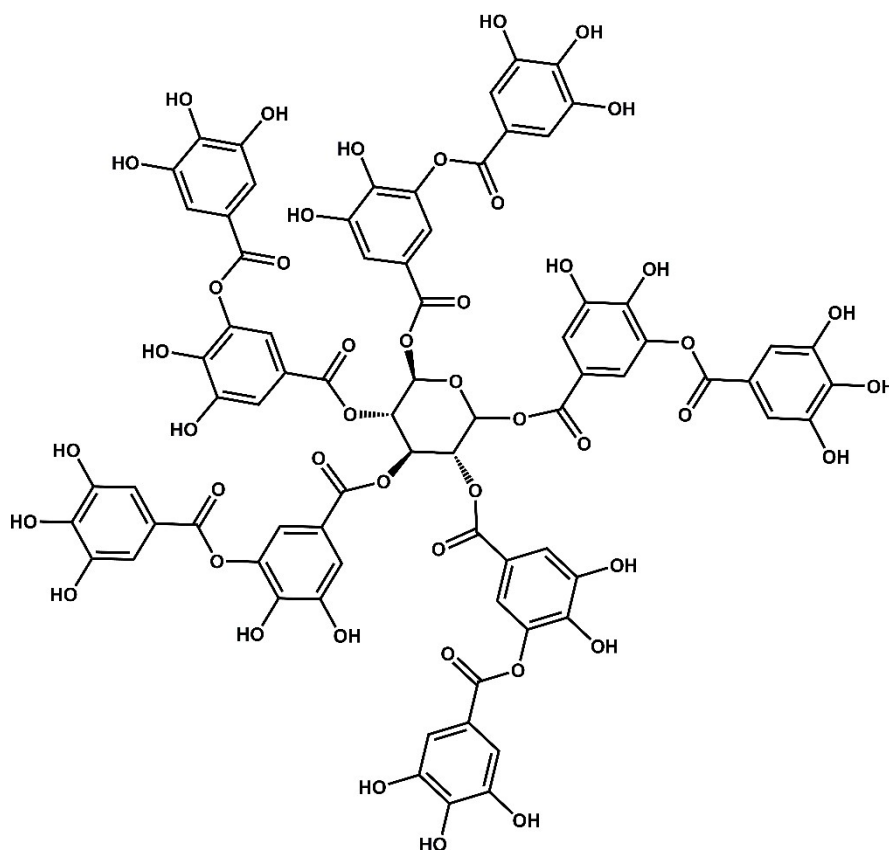

Supplementary Figure S2. Chemical structure of tannic acid.

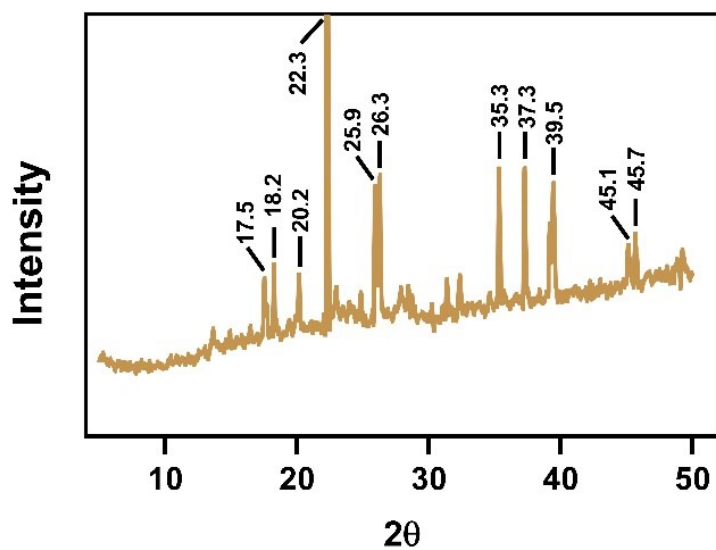

Supplementary Figure S3. X-ray diffractogram of  $\text{EuCl}_3$ .

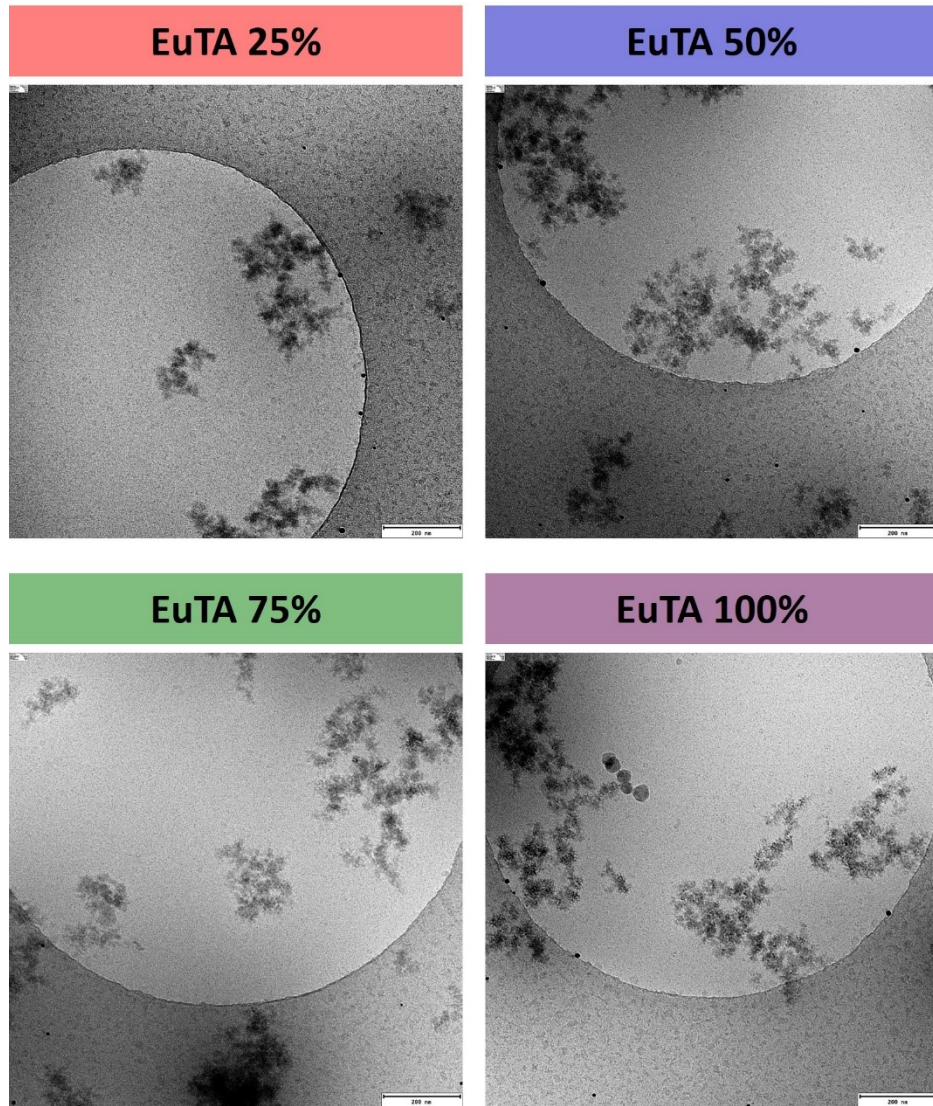

**Supplementary Figure S4. Cryo-TEM images of EuTA NCs with different C. R. values. Black bars correspond to 200 nm.**

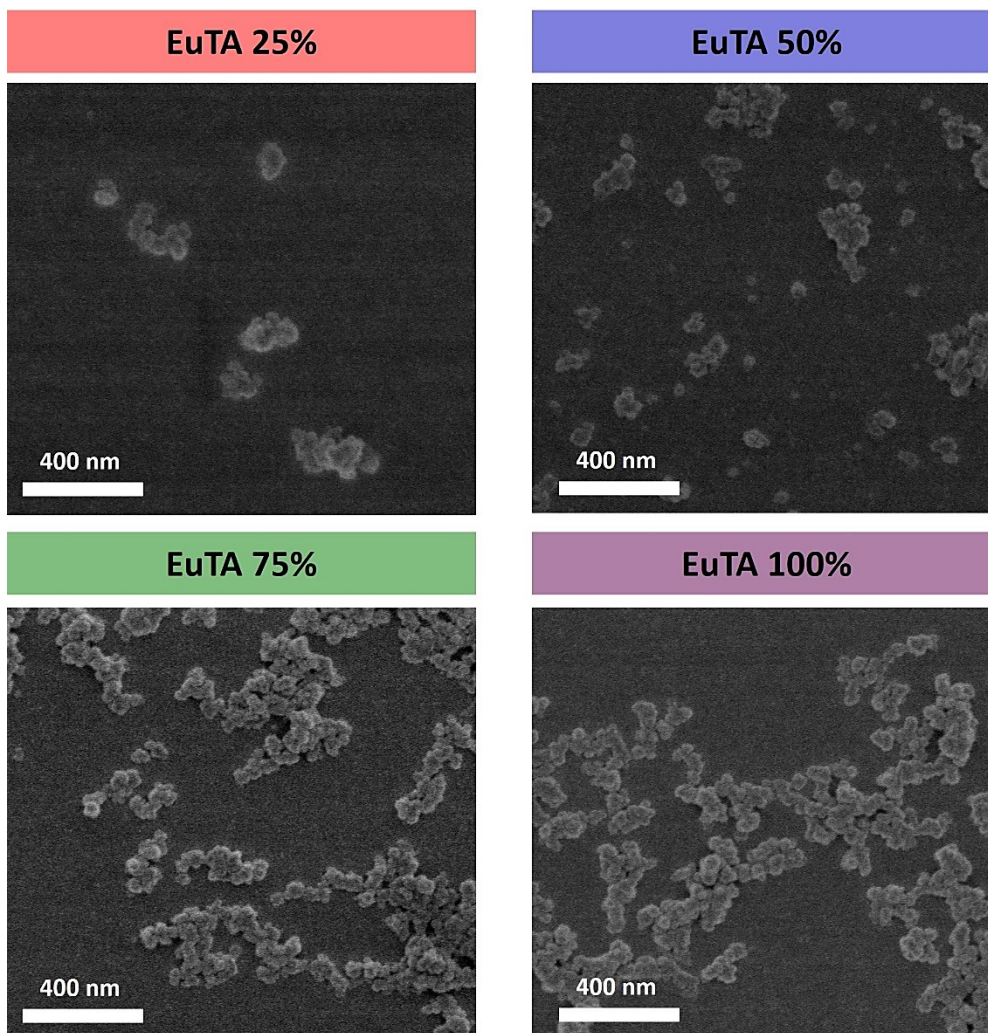

**Supplementary Figure S5. FE-SEM micrographs of EuTA NCs with different C. R. values.**

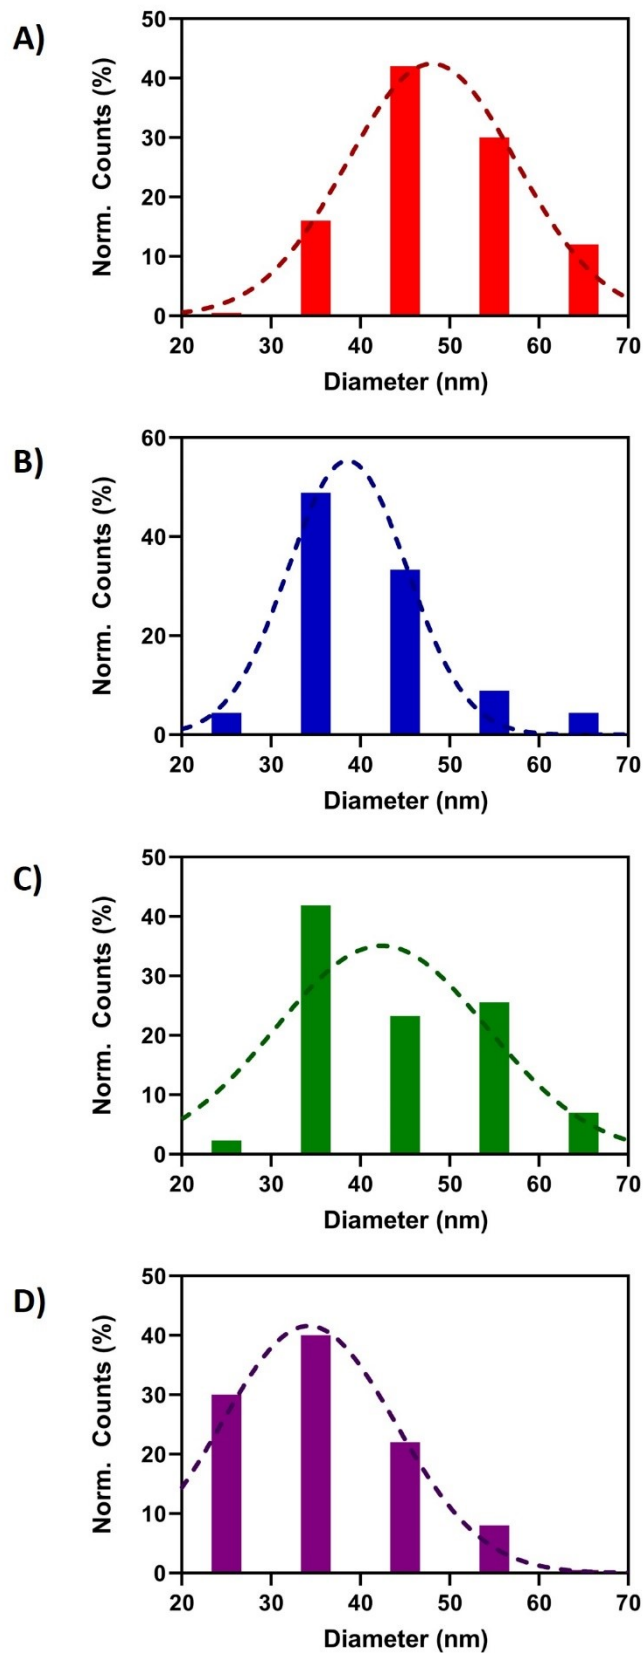

Supplementary Figure S6. Histograms depicting the size distribution of the nanoparticles that conform the EuTA NCs with different C. R. values: A) 25%, B) 50%, C) 75%, and D) 100%.



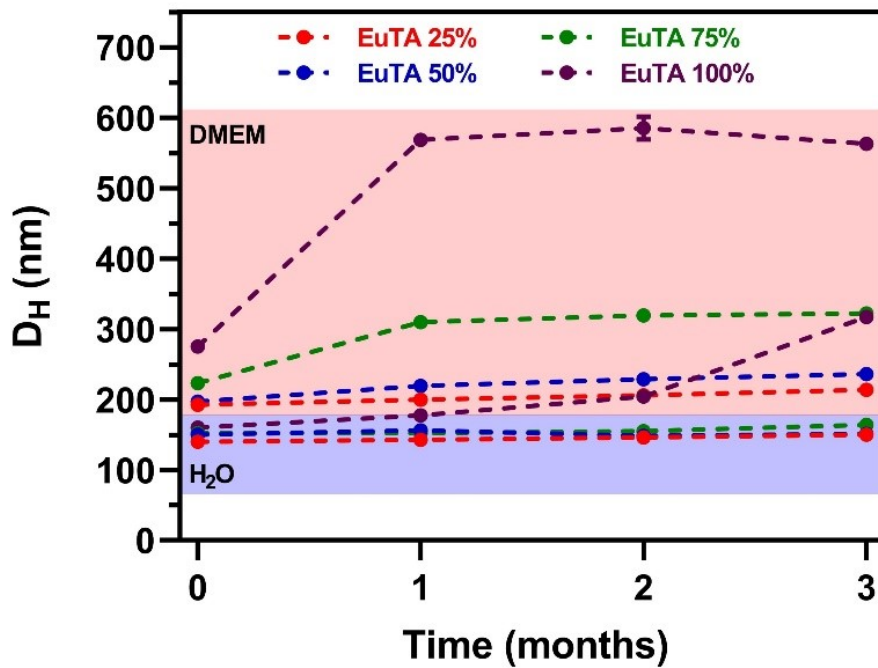

**Supplementary Figure S7.** Long-term stability study of EuTA NCs conducted in distilled water and DMEM for up to 3 months.

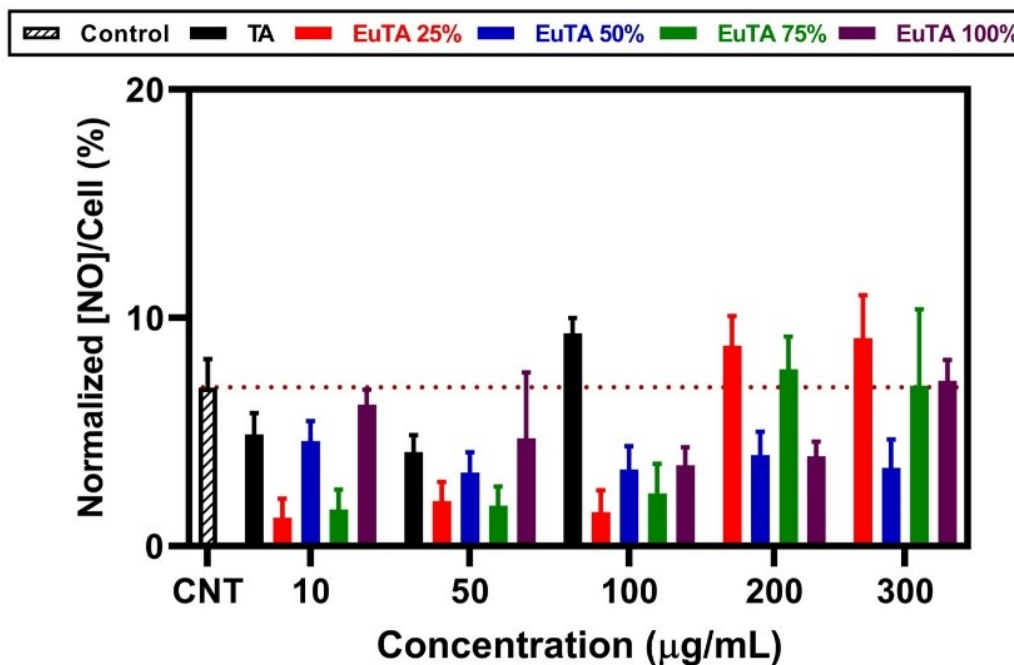

**Supplementary Figure S8.** Production of NO by resting macrophages treated with different concentrations of TA or EuTA NCs, and corrected attending to the metabolic activity of the cultures. Normalization was performed assuming a 100% release of NO by LPS-stimulated macrophages in the absence of any treatment.

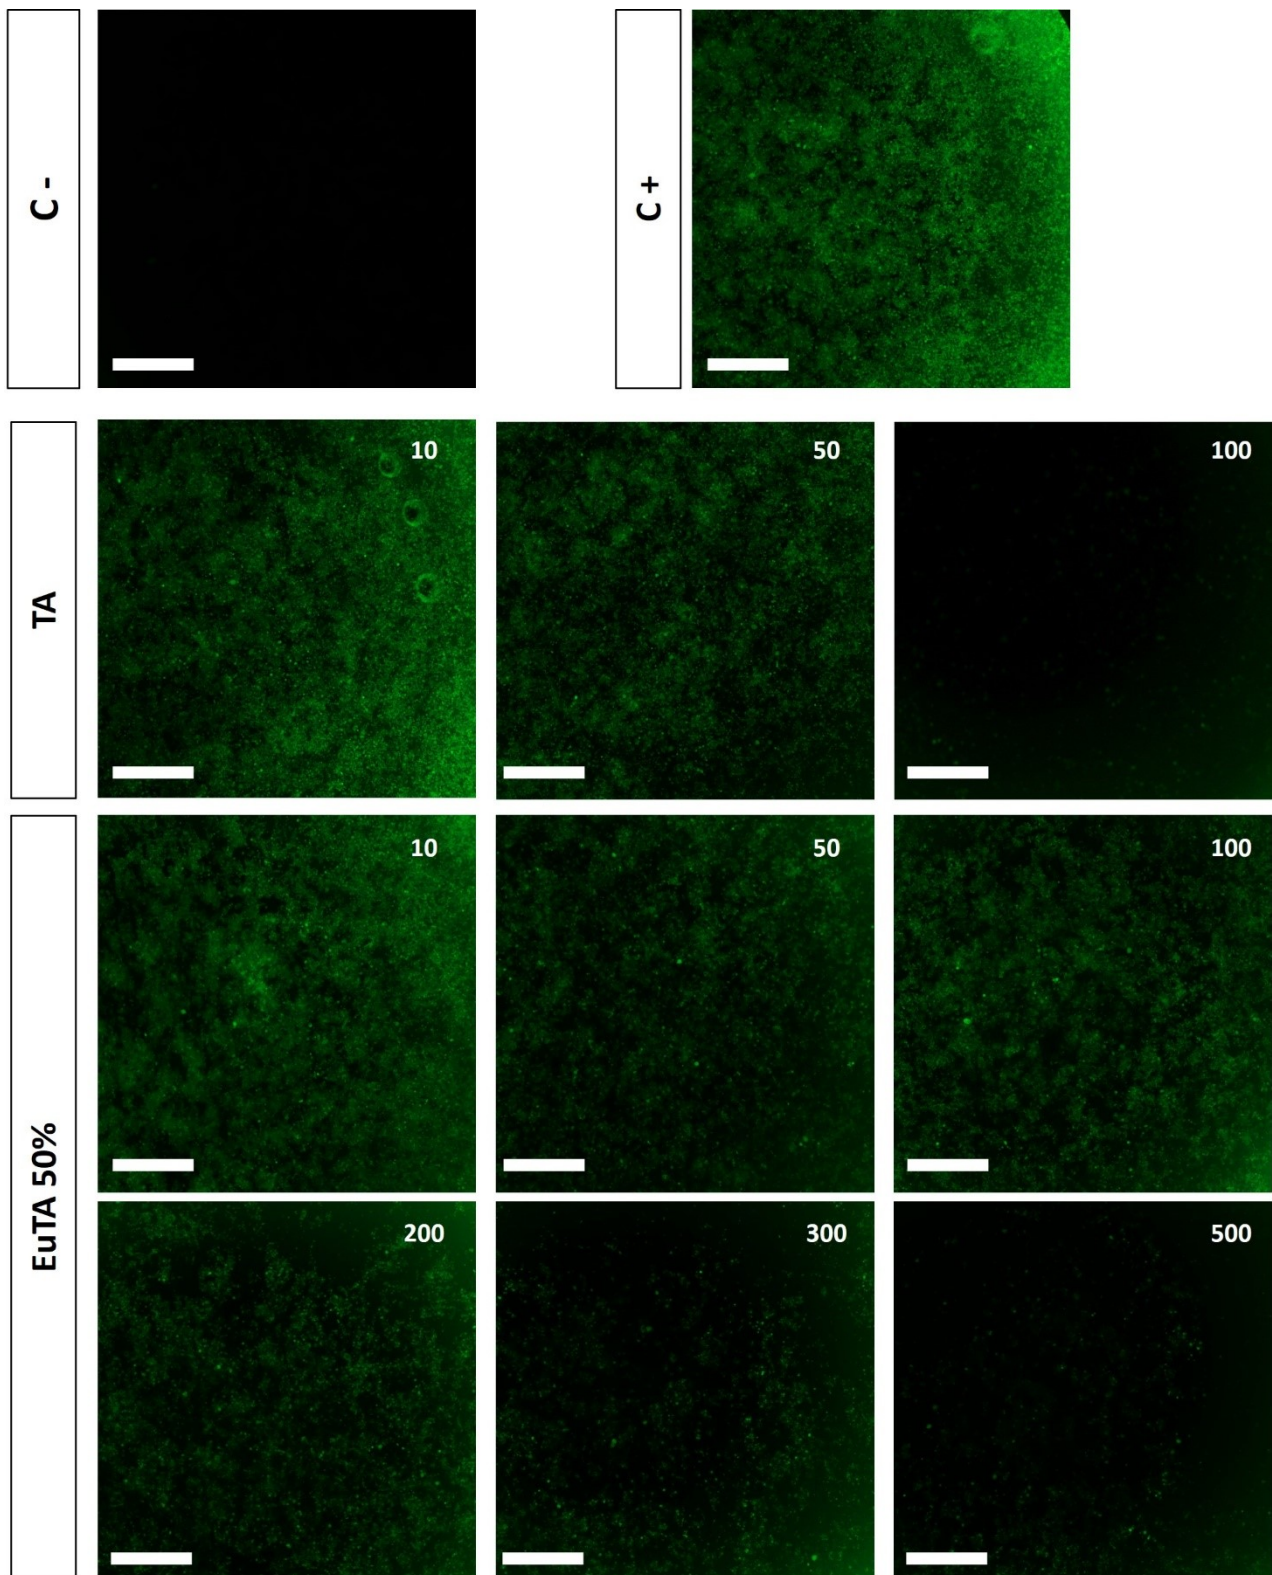

**Supplementary Figure S9. Evaluation of the intracellular ROS scavenging activity of a 24-h pre-treatment with TA and EuTA NCs before a 15-minute exposure to 100 mM H<sub>2</sub>O<sub>2</sub> by qualitatively assessing the fluorescence of DCFH-DA dye by fluorescence microscopy imaging. White bars correspond to 250 μm.**

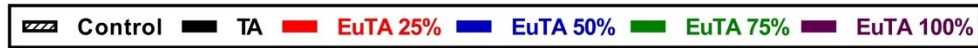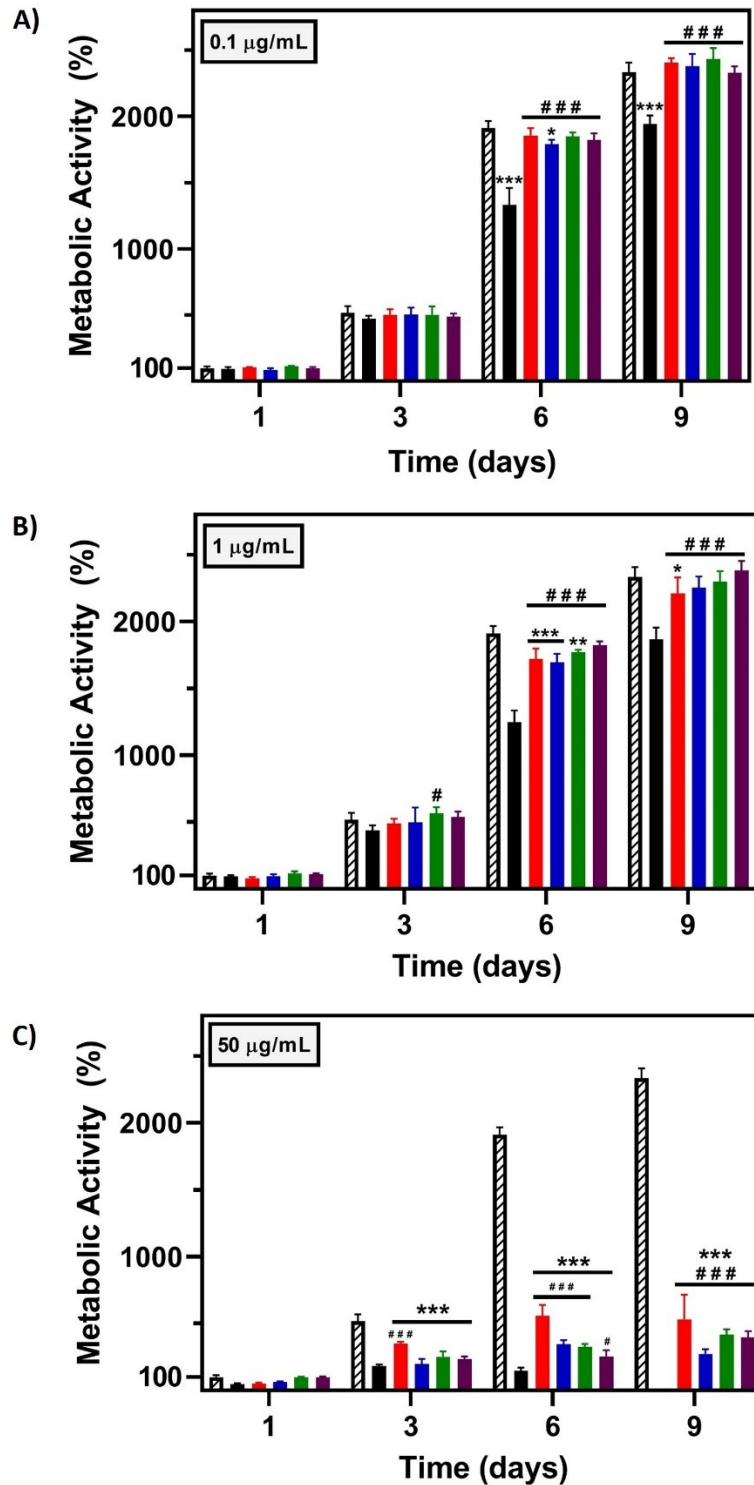

**Supplementary Figure S10. Cell proliferation assay** of independent cultures determined by monitoring the metabolic activity via alamarBlue measurements at different incubation times with 0.1, 1, and 5 µg/mL of TA or EuTA NCs. ANOVA: \* and # symbols are used to compare conditions at the same experimental times with control and TA-treated cultures, respectively. Statistical significance: \*,# p < 0.05; \*\*,## p < 0.01; \*\*\*,### p < 0.001

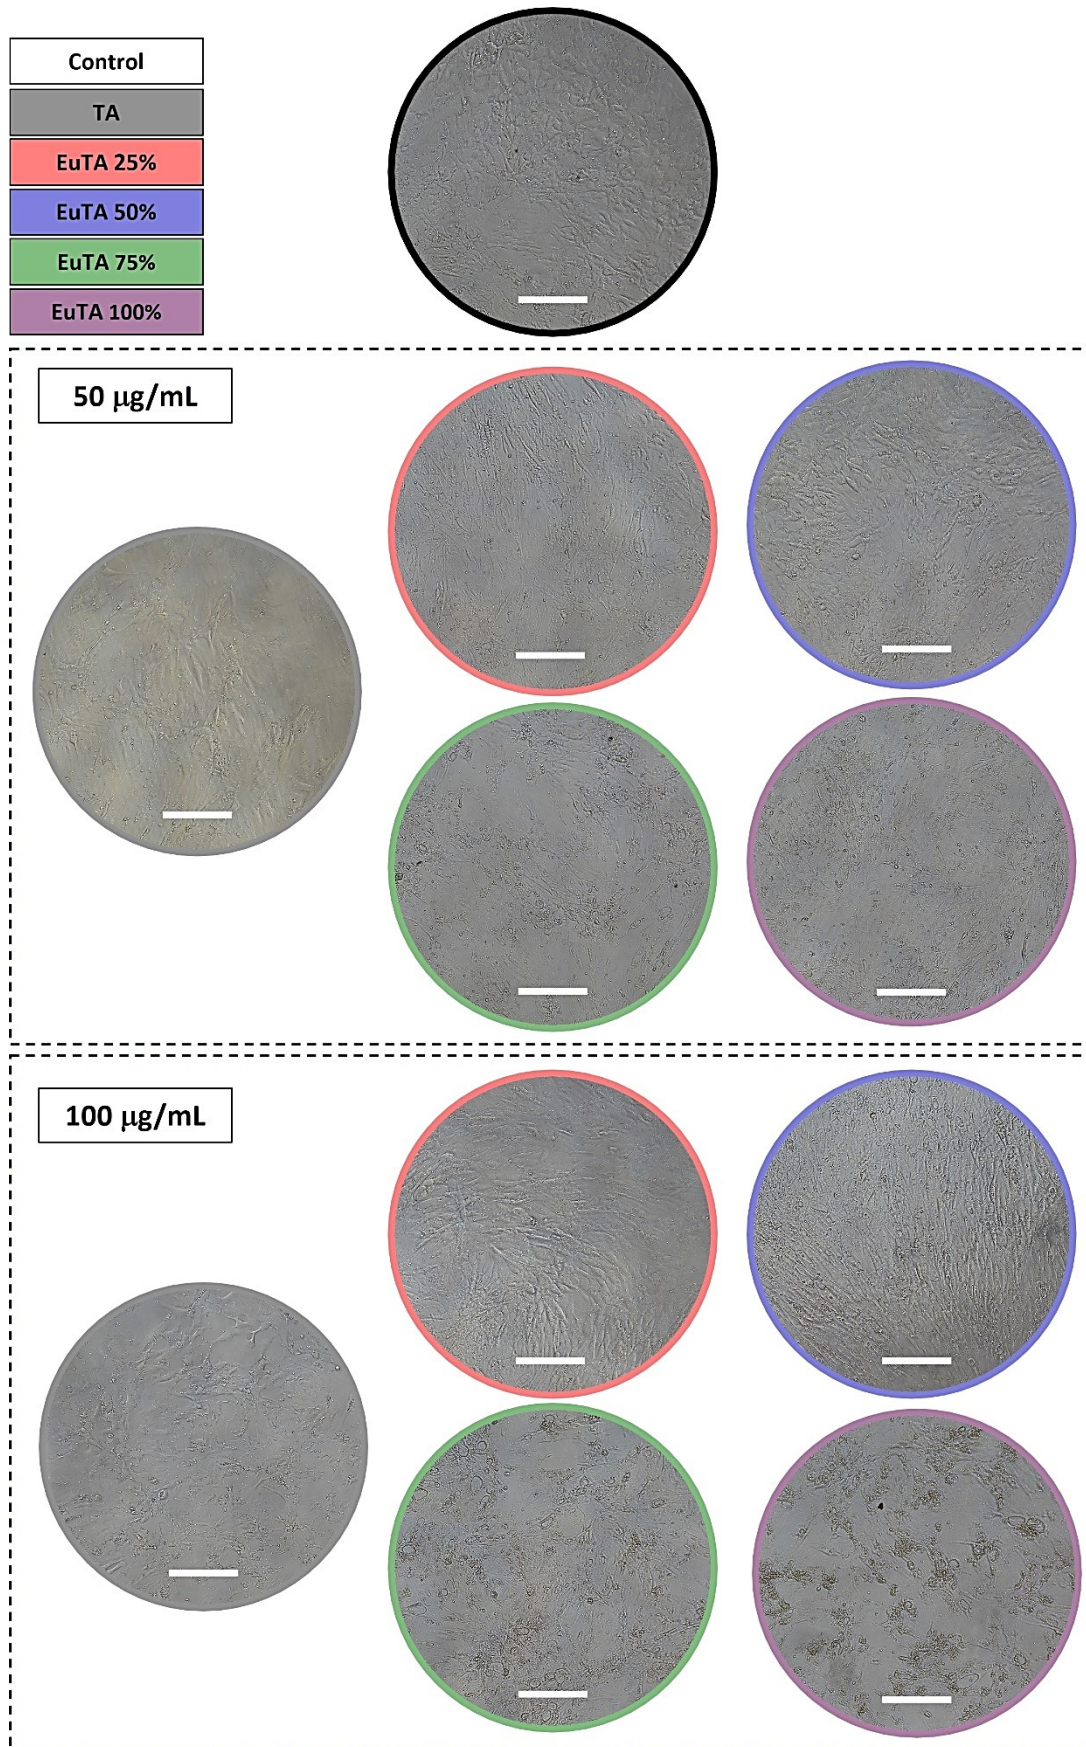

**Supplementary Figure S11. Phase contrast optical microscopy images of fHOB cultures following a three-day treatment with 50 or 100  $\mu\text{g}/\text{mL}$  TA or EuTA NCs. White bars correspond to 250  $\mu\text{m}$ .**

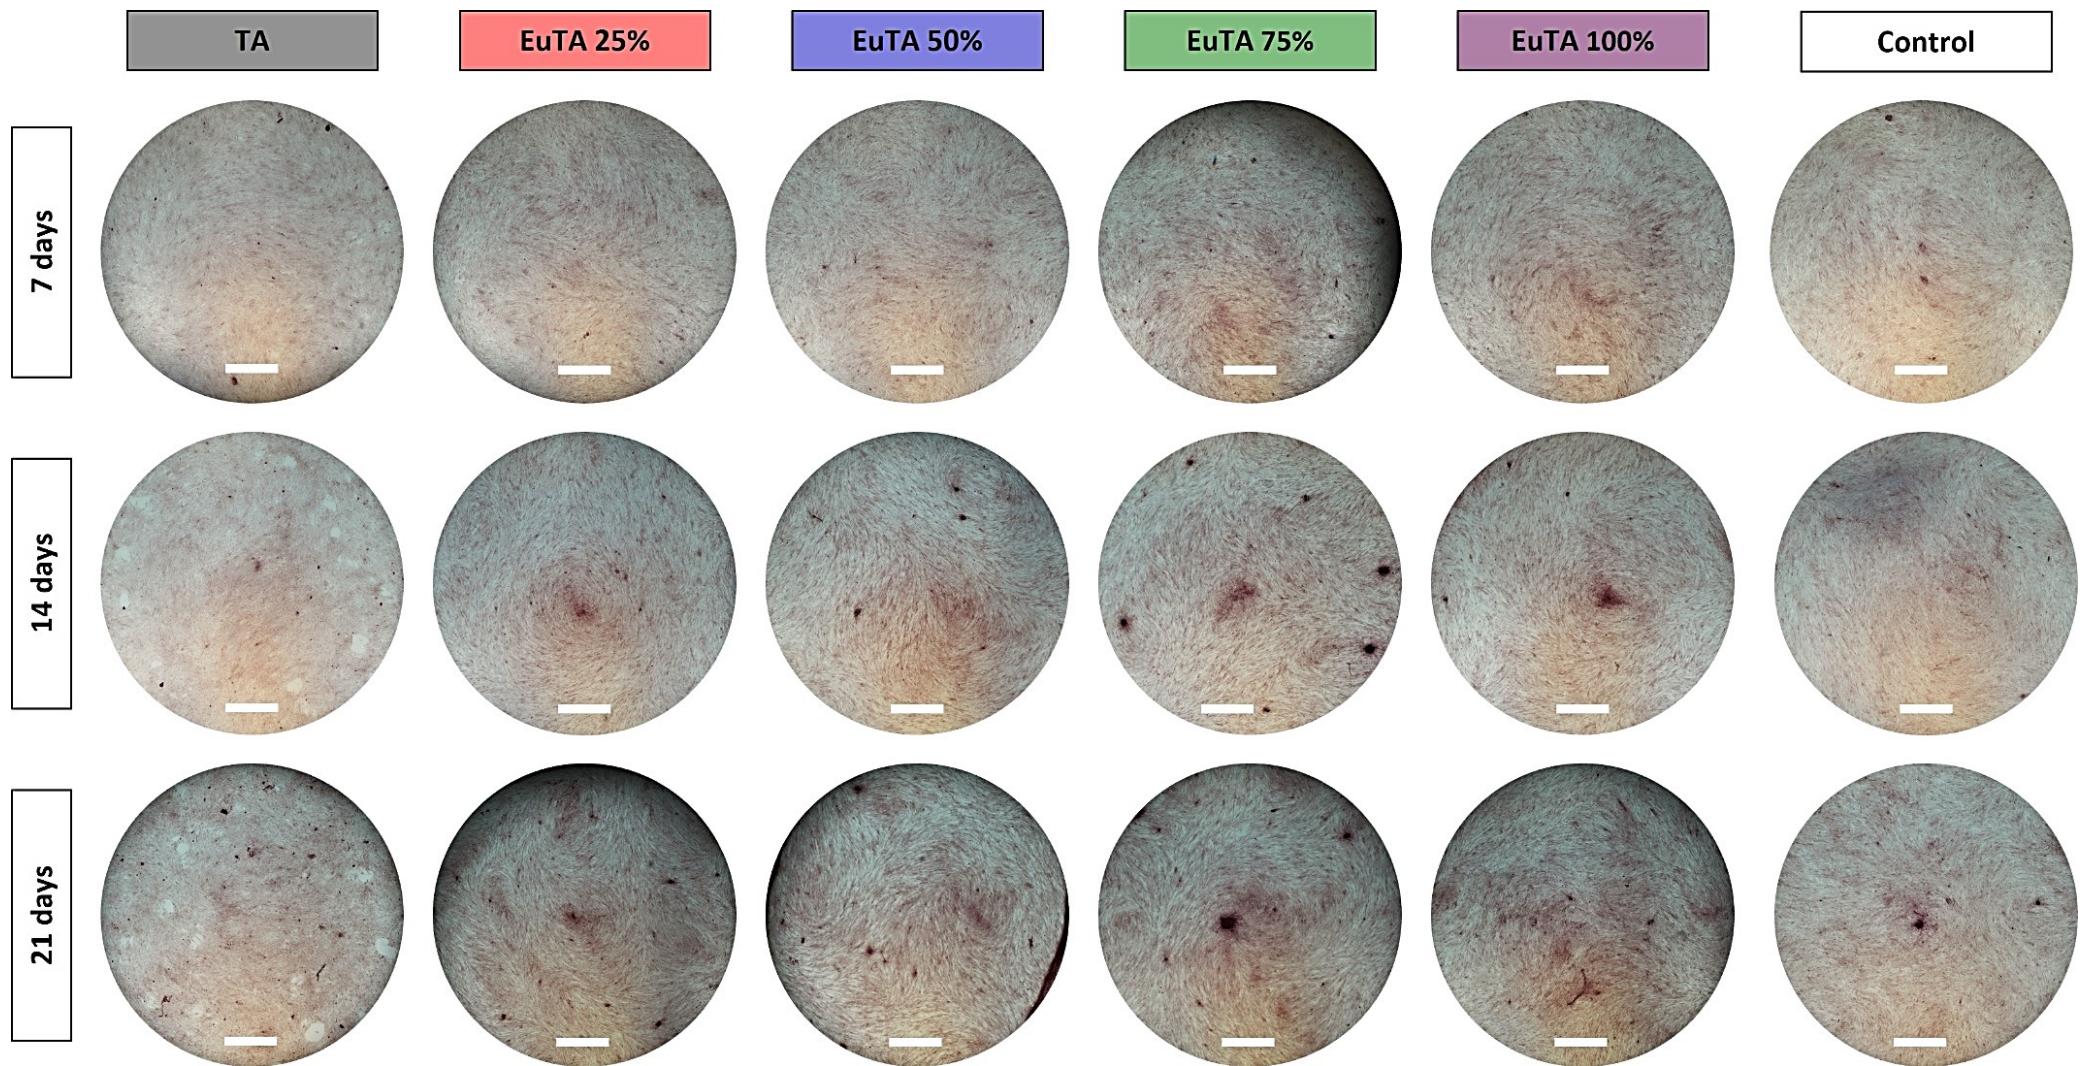

**Supplementary Figure S12.** Phase contrast optical microscopy images of fHOB cultures treated with 10  $\mu\text{g}/\text{mL}$  TA or EuTA NCs for different times and stained with AzR. White bars correspond to 250  $\mu\text{m}$ .
